# Supplementary material
Source: publisher site journal article supplement (https://www.dovepress.com/article/564100)
Supplement: Supplementary file 1 [file 564100_Supplementary%20materials-mc%2526llj_1.docx]

**Supplemental Material**

**List of Content**

1. **Supplemental Tables**

- Table S1. Definition of comorbidities and outcomes
- Table S2. Definition of study variables
- Table S3. Missing rates of study variables
- Table S4. The baseline characteristics were compared between two groups stratified by anticoagulant using propensity score matching

1. **Supplemental Figure**

- Figure S1. Distribution of the rate of renal function decline in the overall population
- **Table S1.** Definition of variables and outcomes based on ICD-10 code.

| Variables | ICD-10 Codes | Rubric/Diagnostic definition |
| --- | --- | --- |
| *Treatment indication* |  |  |
| Atrial fibrillation | I48 | Admission≥1 |
| Venous thromboembolism | I26, O88.201, O08.204, I80.102, I80.103, I80.104, I80.201, I80.203, 80.204, I80.206, I80.207, I80.208, I80.300, I80.302, I80.303, I80.801, I80.802, I80.804, I80.902, I82.202, I82.203, I82.204, I82.300, I82.301, I82.8, I82.9 | Admission≥1 |
| Cardiac valve surgery | Z95.2, Z95.3, Z95.4 | Admission≥1 |
| Cerebral embolism | I63.4 | Admission≥1 Cryptogenic ischemic stroke (without AF or other underlying processes) |
| Intracardiac thrombus | I51.3 | Admission≥1 |
| Cerebral venous thrombosis (CVT) | I67.6 | Admission≥1 |
| Arterial embolism | I74.001, I74.101, I74.200x004, I74.201, I74.300x121, I74.300x122, I74.300x123, I74.300x220, I74.300x222, I74.300x223, I74.300x320, I74.300x420, I74.300x520, I74.301, I74.304, I74.400x002, I74.401, I74.500x011, I74.500x012, I74.500x013, I74.501, I74.800x004, I74.800x005, I74.800x008, I74.800x021, I74.803, I74.805, I74.806, I74.901, I74.902 | Admission≥1 |
| *Comorbidities* |  |  |
| Hypertension | I10, I11, I12, I13, I15 | Admission or outpatient department≥1 |
| Diabetes mellitus | E10, E11, E12, E13, E14, O24 | Admission or outpatient department≥1 |
| History of ischemic stroke | I63, G46.3, G46.4, G46.5, G46.6, G46.7, I69.3, I69.801, Z86.703 | Admission or outpatient department≥1 |
| Heart failure | I09.9, I11.0, I13.0, I13.2, I25.5, I42.0, I42.5-I42.9, I43, I50.0, I50.1, I50.900, I50.900x001, I50.900x002, I50.900x008, I50.900x009, I50.900x010, I50.900x014, I50.900x015, I50.900x016, I50.900x017, I50.900x018, I50.900x019, I50.900x021, I50.900x022, I50.900x023, I50.904, I50.905, I50.906, I50.907, I50.908, I97.000x011, I97.001, I97.100x004, I97.101, I97.102, I97.803, J81.x00, J81.x00x002, J95.811, O99.500x008, O99.507, R57.000, O29.100x002, O29.100x012, O75.403, O89.100x002, O99.400x008, T81.800x010 | Admission or outpatient department≥1 |
| Coronary artery disease | I21, I22, I25.2 | Admission or outpatient department≥1 |
| Chronic pulmonary disease | I27.8、I27.9、J40, J41, J42, J43, J44, J45, J46, J47, J60, J61, J62, J63, J64, J65, J66, J67, J68.4, J70.1, J70.3, J84.1, J92.0, J96.1, J98.2, J98.3 | Admission or outpatient department≥1 |
| Liver disease | B15.0, B16.0, B16.2, B19.0, B18, I85, I86.4, I98.2, K70, K71.0, K71.1, K71.2, K71.3, K71.4, K71.5, K71.6, K71.7, K71.8, K71.9, K72, K73, K74, K76.0, K76.1, K76.2, K76.3, K76.4, K76.5, K76.6, K76.7, K76.8, K76.9 Z94.4 | Admission or outpatient department≥1 |
| Peptic ulcer disease | K22.1, K25, K26, K27, K28 | Admission or outpatient department≥1 |
| Cancer | C00, C01, C02, C03, C04, C05, C06, C07, C08, C09, C10, C11, C12, C13, C14, C15, C16, C17, C18, C19, C20, C21, C22, C23, C24, C25, C26, C30, C31, C32, C33, C34, C37, C38, C39, C40, C41, C43, C45, C46, C47, C48, C49, C50, C51, C52, C53, C54, C55, C56, C57, C58, C60, C61, C62, C63, C64, C65, C66, C67, C68, C69, C70, C71, C72, C73, C74, C75, C76, C77, C78, C79, C80, C81, C82, C83, C84, C85, C88, C90, C91, C92, C93, C94, C95, C96, C97 | Admission or outpatient department≥1 |
| Solid tumor without metastasis | C00, C01, C02, C03, C04, C05, C06, C07, C08, C09, C10, C11, C12, C13, C14, C15, C16, C17, C18, C19, C20, C21, C22, C23, C24, C25, C26, C30, C31, C32, C33, C34, C37, C38, C39, C40, C41, C43, C45, C46, C47, C48, C49, C50, C51, C52, C53, C54, C55, C56, C57, C58, C60, C61, C62, C63, C64, C65, C66, C67, C68, C69, C70, C71, C72, C73, C74, C75, C76, C81, C82, C83, C84, C85, C88, C90, C91, C92, C93, C94, C95, C96, C97 | Admission or outpatient department≥1 |
| Metastatic cancer | C77, C78, C79, C80 | Admission or outpatient department≥1 |

- **Table S2.** Definition of study variables

| Variables | Definition | Continuous/Categorical/Binary |
| --- | --- | --- |
| *Patient demographics* | | |
| Age | Years after birth | Continuous, per 1 year |
| Sex | Female/Male | Binary, Female/Male |
| *Previous History* | | |
| Hypertension | Previously diagnosed with hypertension and/or currently on pharmacological therapy for the treatment of hypertension | Binary, Yes/No |
| Diabetes mellitus | History of diabetes mellitus, regardless of duration of disease or need for antidiabetic agents | Binary, Yes/No |
| Coronary artery disease | Previous history of ischemic heart disease | Binary, Yes/No |
| Heart failure | Previous history of heart failure | Binary, Yes/No |
| Chronic pulmonary disease | Previous history of chronic pulmonary disease | Binary, Yes/No |
| Ischemic stroke | Previous history of ischemic stroke | Binary, Yes/No |
| Gastrointestinal disease | Previous history of gastrointestinal disease | Binary, Yes/No |
| Liver disease | Previous history of liver disease | Binary, Yes/No |
| Cancer | Previous history of cancer (other than skin cancer) | Binary, Yes/No |
| Anemia | Previous history of anemia | Binary, Yes/No |
| *Clinical characteristics* | | |
| SBP | SBP measured on or within 1 year of index time | Continuous, in mmHg |
| LDL-C | LDL-C measured on or within 1 year of index time | Continuous, in mg/dL |
| eGFR | Calculated using CKD-EPI equation | Continuous, per 1.0 mL/min/1.73m2 |
| Lymphocyte count | Lymphocyte count measured on or within 1 year of index time | Continuous, PCS /uL |
| Serum albumin | Serum albumin measured on or within 1 year of index time | Continuous, g/L |
| PNI | Equal to Albumin (g/L) +5* lymphocyte count (*109/L) | Continuous |
| *Concomitant medication use* | | |
| Aspirin | At least one aspirin prescription within the period of every 6 months during follow-up | Binary, Yes/No |
| P2Y12 inhibitor | At least one P2Y12 inhibitor prescription within the period of every 6 months during follow-up | Binary, Yes/No |
| Statin | At least one statins prescription within the period of every 6 months during follow-up | Binary, Yes/No |
| ACEI/ARB | At least one RASi prescription within the period of every 6 months during follow-up | Binary, Yes/No |
| β-blocker | Use of any kinds of β-blockers in the past 2 weeks before symptom onset  At least one β-blocker prescription within the period of every 6 months during follow-up | Binary, Yes/No |
| Hypoglycemic drugs | At least one hypoglycemic drugs prescription within the period of every 6 months during follow-up | Binary, Yes/No |

- **Abbreviations:** ACEI: angiotensin-converting enzyme inhibitor; ARB: angiotensin II receptor blocker; eGFR, estimated glomerular filtration rate; LDL-C, low-density lipoprotein cholesterol; RASi, renin-angiotensin system inhibitors; SBP, systolic blood pressure; VTE, venous thromboembolism; PNI: prognostic nutritional index.
- **Table S3.** Missing rates of study variables

| Variables | Missing, N (%)  *n*=8842 |
| --- | --- |
| SBP | 2088 (23.6%) |
| LDL-C | 3541 (40.1%) |

- **Abbreviations:** LDL-C, low-density lipoprotein cholesterol; SBP, systolic blood pressure.
- **Table S4**. The baseline characteristics were compared between two groups stratified by anticoagulant using propensity score matching

| Factor | | Total  (n=6698) | | Warfarin  (n=3349) | | Rivaroxaban  (n=3349) | | ASD | |
| --- | --- | --- | --- | --- | --- | --- | --- | --- | --- |
| Age,  median (IQR) | | 67  (60, 74) | | 66  (60, 73) | | 67  (60, 75) | | 0.07 | |
| Male  (*n*, %) | | 3518  (52.5%) | | 1762  (52.6%) | | 1756  (52.4%) | | 0.004 | |
| Smoking  (*n*, %) | | 759  (11.3%) | | 379  (11.3%) | | 380  (11.3%) | | 0.001 | |
| Drinking  (*n*, %) | | 367  (5.5%) | | 184  (5.5%) | | 183  (5.5%) | | 0.001 | |
| Tianjin permanent residents(*n*, %) | | 6089  (90.9%) | | 3046  (91.0%) | | 3043  (90.9%) | | 0.003 | |
| *Treatment_indication* |  | |  | |  | |  | |
| AF | | 4042  (60.3%) | | 2047  (61.1%) | | 1995  (59.6%) | | 0.01 | |
| VTE | | 2357  (35.2%) | | 1112  (33.2%) | | 1245  (37.2%) | |  | |
| Others | | 299  (4.5%) | | 190  (5.7%) | | 109  (3.2%) | |  | |
| Hypertension  ( *n*, %) | | 4640  (69.3%) | | 2312  (69.0%) | | 2328  (69.5%) | | 0.01 | |
| Diabetes mellitus  (*n*, %) | | 875  (13.1%) | | 410  (12.2%) | | 465  (13.9%) | | 0.055 | |
| Coronary artery disease history(*n*, %) | | 229  (3.4%) | | 115  (3.4%) | | 114  (3.4%) | | 0.002 | |
| Heart failure history  (*n*, %) | | 2682  (40.0%) | | 1391  (41.5%) | | 1291  (38.5%) | | 0.06 | |
| Ischemic stroke  (*n*, %) | | 790  (11.8%) | | 376  (11.2%) | | 414  (12.4%) | | 0.04 | |
| Anemia history  (*n*, %) | | 315  (4.7%) | | 152  (4.5%) | | 163  (4.9%) | | 0.02 | |
| Chronic pulmonary history(*n*, %) | | 939  (14.0%) | | 460  (13.7%) | | 479  (14.3%) | | 0.02 | |
| Liver disease history  (*n*, %) | | 1715  (25.6%) | | 840  (25.1%) | | 875  (26.1%) | | 0.02 | |
| Gastrointestinal bleeding history(*n*, %) | | 170  (2.5%) | | 81  (2.4%) | | 89  (2.7%) | | 0.02 | |
| Cancer history  (*n*, %) | | 418  (6.2%) | | 196  (5.9%) | | 222  (6.6%) | | 0.03 | |
| PNI, median  (IQR) | | 47.75  (43.81, 51.5) | | 47.8  (44, 51.4) | | 47.75  (43.7, 51.55) | | 0.02 | |
| *Medication used in the first 6 months before hospitalization:* | |  | |  | |  | |  | |
| Antiplatelet agents  (*n*, %) | | 2038  (30.4%) | | 1000  (29.9%) | | 1038  (31.0%) | | 0.025 | |
| Statin  (*n*, %) | | 1553  (23.2%) | | 769  (23.0%) | | 784  (23.4%) | | 0.01 | |
| AECI/ARB  (n,%) | | 1429  (21.3%) | | 702  (21.0%) | | 727  (21.7%) | | 0.02 | |
| Beta blockers  (n,%) | | 1598  (23.9%) | | 791  (23.6%) | | 807  (24.1%) | | 0.01 | |
| Antidiabetic drugs  (n,%) | | 1467  (21.9%) | | 723  (21.6%) | | 744  (22.2%) | | 0.02 | |

ASD, absolute standardized difference; ACEI/ARB, angiotensin-converting enzyme inhibitor/angiotensin II receptor blocker; AF, Atrial fibrillation; ASD, absolute standardized differences; PNI, prognostic nutritional index, = Albumin (g/L) +5* lymphocyte count (*10^9/L); VTE, venous thromboembolism.


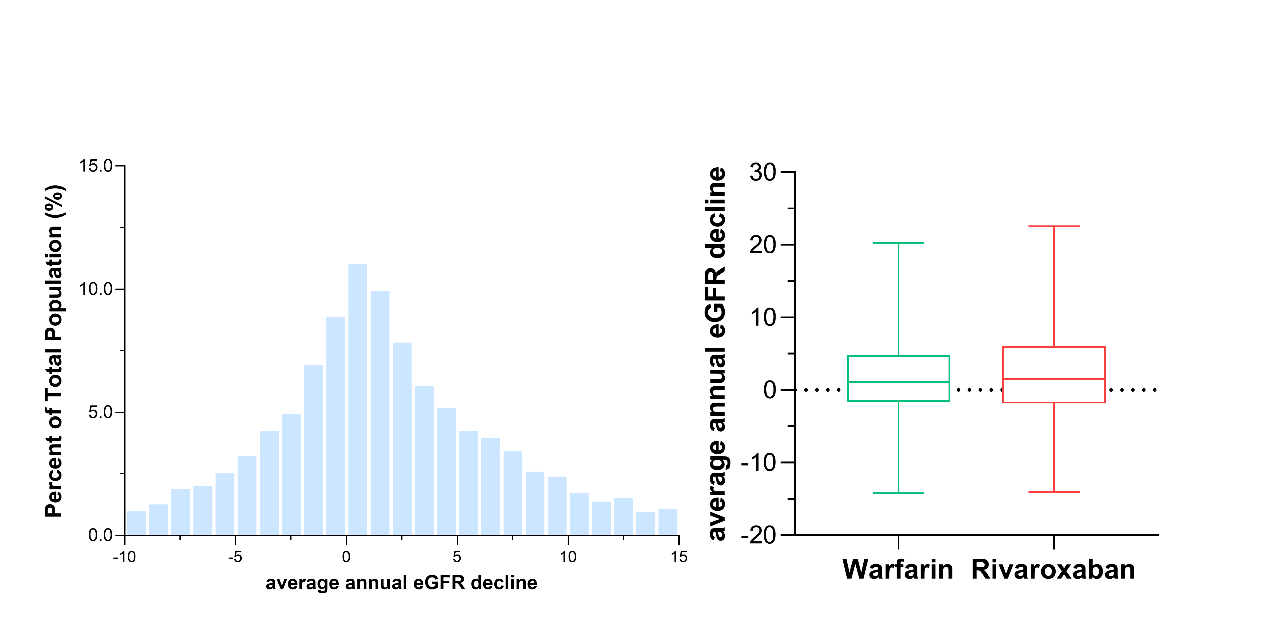


**Figure S1**. Distribution of the rate of renal function decline in the overall population. The annual decline of eGFR in the overall population, with a median decline of 1.29 mL/min/1.73 m2/year (5.47 to -1.72)**.**

eGFR, estimated glomerular filtration rate.
